# Supplementary material
Source: PubMed Central journal article supplement (PMC2526680)
Supplement: E08-04-0433_1.pdf [file E08-04-0433_1.pdf]

## Supplementary materials

### Supplementary Figures

**Supplementary Figure 1.** Mathematical modeling of RACK1 and GRK2-ct dependent inhibition of G $\beta\gamma$ -mediated PI3K $\gamma$  activation. (A). Reactions that describe the quantitative relationship between the binding of RACK1 and GRK2-ct to G $\beta\gamma$  and G $\beta\gamma$ -dependent PI3K $\gamma$  activation. (B). Equations describing the affinities of PI3K $\gamma$  for G $\beta\gamma$  ( $Kd1_{PI3K\gamma}$ ), RACK1 for G $\beta\gamma$  ( $Kd2_{RACK1}$ ) and GRK2-ct for G $\beta\gamma$  ( $Kd2_{GRK2-ct}$ ). (C). Equations describing the initial concentration of G $\beta 1\gamma 2$  ( $[G\beta 1\gamma 2]_0$ ), PI3K $\gamma$  ( $[PI3K\gamma]_0$ ), RACK1 ( $[RACK1]_0$ ) and GRK2-ct ( $[GRK2-ct]_0$ ).

**Supplementary Figure 2.** Comparison between empirical results and theoretical simulations of RACK1 and GRK2-ct mediated inhibition of PI3K $\gamma$  activation. The empirical results were taken from Figure 8A in the paper. Mathematical simulations were performed by Matlab using the following parameters,  $[G\beta 1\gamma 2]_0 = 100$  nM,  $[PI3K\gamma]_0 = 5.6$  nM,  $[RACK1] = 10$  nM-20  $\mu$ M,  $[GRK2-ct] = 10$  nM-20  $\mu$ M, (A)  $Kd1_{PI3K\gamma} = 5.6$  nM,  $Kd2_{RACK1} = 520$  nM,  $Kd2_{GRK2-ct} = 100$  nM; (B),  $Kd1_{PI3K\gamma} = 5.6$  nM,  $Kd2_{RACK1} = 1040$  nM,  $Kd2_{GRK2-ct} = 200$  nM; (C),  $Kd1_{PI3K\gamma} = 2.8$  nM,  $Kd2_{RACK1} = 520$  nM,  $Kd2_{GRK2-ct} = 100$  nM. Dash lines, empirical data; Solid lines, theoretical simulations.

**Supplementary videos 1-5.** The chemotactic response and translocation of PH-AKT-GFP in transiently transfected dHL60 cells to a point source of fMLP (10  $\mu$ M) delivered by a micropipette. Video 1, cells expressing PH-AKT-GFP alone; Video 2, cells transfected with PH-AKT-GFP together with RACK1 siRNA; Video 3-1 and 3-2, cells transfected with PH-AKT-GFP together with RACK1; Video 4, cells transfected with PH-AKT-GFP together with BD1-2; Video 5, cells transfected with PH-AKT-GFP together with BD5-7. Videos 1, 2, 3-1, 4 and 5 are related to Figure 10A-E. The first frame of each video shows the cells prior to the exposure to fMLP. The position of the

micropipette filled with fMLP is indicated by an asterisk in the second frame of each video. Videos are played at 6 frames per second and can be opened by QuickTime. Note that the cell in video 3-2 failed to migrate toward the chemoattractant probably due to higher levels of RACK1 overexpression.

**A**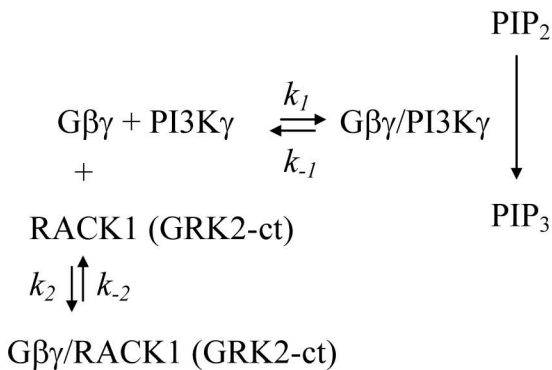**B**

$$Kd1_{\text{PI3K}\gamma} = \frac{k_{-1}}{k_1} = \frac{[\text{G}\beta\gamma][\text{PI3K}\gamma]}{[\text{G}\beta\gamma/\text{PI3K}\gamma]}$$

$$Kd2_{\text{RACK1}} = \frac{k_{-2}}{k_2} = \frac{[\text{G}\beta\gamma][\text{RACK1}]}{[\text{G}\beta\gamma/\text{RACK1}]}$$

$$Kd2_{\text{GRK2-ct}} = \frac{k_{-2}}{k_2} = \frac{[\text{G}\beta\gamma][\text{GRK2-ct}]}{[\text{G}\beta\gamma/\text{GRK2-ct}]}$$

**C**

$$[\text{G}\beta 1\gamma 2]_0 = [\text{G}\beta 1\gamma 2] + [\text{G}\beta 1\gamma 2/\text{PI3K}\gamma] + [\text{G}\beta 1\gamma 2/\text{RACK1}]$$

$$[\text{PI3K}\gamma]_0 = [\text{PI3K}\gamma] + [\text{G}\beta 1\gamma 2/\text{PI3K}\gamma]$$

$$[\text{RACK1}]_0 = [\text{RACK1}] + [\text{G}\beta 1\gamma 2/\text{RACK1}]$$

$$[\text{GRK2-ct}]_0 = [\text{GRK2-ct}] + [\text{G}\beta 1\gamma 2/\text{GRK2-ct}]$$

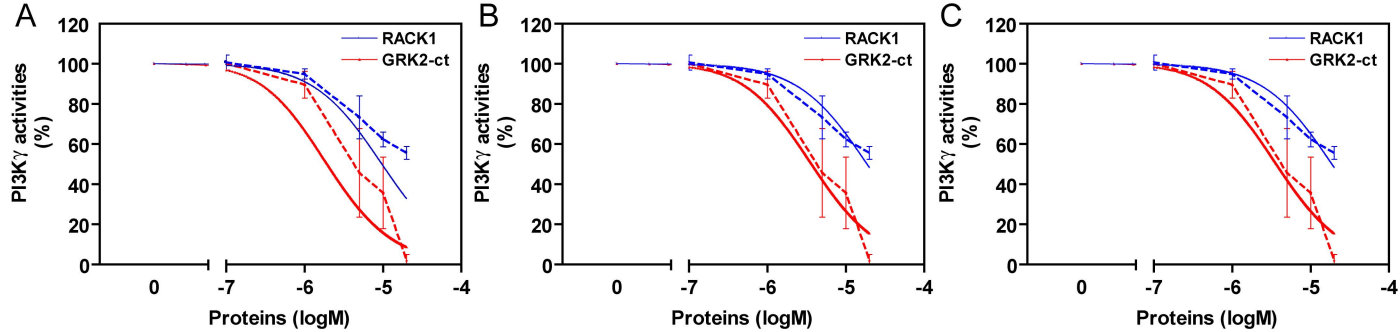

Supplementary Figure 2
